# Supplementary material
Source: HighWire-hosted journal article supplement (http://www.cmaj.ca/highwire/filestream/80273/field_highwire_adjunct_files/2/210053-res-3-at.pdf)
Supplement: 210053-res-3-at.pdf [file 210053-res-3-at.pdf]

## Appendix 3

**Supplementary Table S1. Minimum incidence rates of SARS-CoV-2, COVID-19, and severe COVID-19 admissions in 2020 among children <18-years of age.**

| Category                                                                             | 2020 midyear population <sup>1</sup> | Incident admissions (per 100,000 population) |          |                              |
|--------------------------------------------------------------------------------------|--------------------------------------|----------------------------------------------|----------|------------------------------|
|                                                                                      |                                      | All Cases                                    | COVID-19 | Severe <sup>2</sup> COVID-19 |
| <b>All admissions in children &lt;18-years of age<sup>3</sup></b>                    | 7,250,351                            | 3.64                                         | 2.07     | 1.03                         |
| Infants (<1 year)                                                                    | 373,629                              | 25.96                                        | 16.86    | 5.62                         |
| Preschool (1-5 years)                                                                | 1,951,453                            | 2.25                                         | 1.18     | 0.56                         |
| School age (6-12 years)                                                              | 2,902,359                            | 1.45                                         | 0.93     | 0.65                         |
| Adolescents (13-17 years)                                                            | 2,022,910                            | 3.81                                         | 1.78     | 1.19                         |
| <b>All admissions in children &lt;18-years of age, excluding Alberta<sup>4</sup></b> | 6,273,621                            | 4.21                                         | 2.39     | 1.20                         |
| Infants (<1 year)                                                                    | 321,903                              | 30.13                                        | 19.57    | 6.52                         |
| Preschool (1-5 years)                                                                | 1,678,376                            | 2.62                                         | 1.37     | 0.66                         |
| School age (6-12 years)                                                              | 2,510,161                            | 1.67                                         | 1.08     | 0.76                         |
| Adolescents (13-17 years)                                                            | 1,763,181                            | 4.37                                         | 2.04     | 1.36                         |

<sup>1</sup>Data retrieved from Statistics Canada. Table 17-10-0005-01 Population estimates on July 1st, by age and sex.<sup>18</sup>

<sup>2</sup>Defined using criteria modified from Dong et al. (2020). Non-severe disease combines mild, and moderate illness; severe disease combines severe and critical illness.

<sup>3</sup>Admissions represent 68.0% of all admissions reported to the Public Health Agency of Canada (PHAC), though this may be an underestimate given inability to disaggregate admissions of 18-year olds in some jurisdictions (personal communication).

<sup>4</sup>Admissions represent 80.0% of all admissions reported to PHAC, though this may be an underestimate given inability to disaggregate admissions of 18-year olds in some jurisdictions (personal communication).

## References

1. Table 17-10-0005-01: Population estimates on July 1st, by age and sex. Ottawa: Statistics Canada. Available: <https://www150.statcan.gc.ca/t1/tbl1/en/cv.action?pid=1710000501> (accessed 2020 Nov. 24).
2. Dong Y, Mo X, Hu Y, et al. Epidemiology of COVID-19 among children in China. *Pediatrics* 2020;145:e20200702.2. Dong Y, Mo X, Hu Y, et al. Epidemiology of COVID-19 among children in China. *Pediatrics* 2020;145:e20200702.
